# Supplementary material for: Plant-expressed cocaine hydrolase variants of butyrylcholinesterase exhibit altered allosteric effects of cholinesterase activity and increased inhibitor sensitivity
Source: PubMed Central journal article supplement (PMC5585256; doi:10.1038/s41598-017-10571-z), 2017-09-05
Supplement: 41598_2017_10571_MOESM1_ESM.pdf [file 41598_2017_10571_MOESM1_ESM.pdf]

1 **SUPPLEMENTARY INFORMATION**

2  
3 **Plant-expressed cocaine hydrolase variants of butyrylcholinesterase**  
4 **exhibit altered allosteric effects of cholinesterase activity and**  
5 **increased inhibitor sensitivity.**  
6

7 **Katherine E Larrimore<sup>1,†</sup>, I. Can Kazan<sup>2</sup>, Latha Kannan<sup>1</sup>, R. Player Kendle<sup>1,‡</sup>,**  
8 **Tameem Jamal<sup>1</sup>, Matthew Barcus<sup>1,^</sup>, Ashini Bolia<sup>2,\*</sup>,**  
9 **Stephen Brimijoin<sup>3</sup>, Chang-Guo Zhan<sup>4</sup>, S. Banu Ozkan<sup>2</sup>, and Tsafirir S Mor<sup>1,\*</sup>**

10 <sup>1</sup>School of Life Sciences and Center of Immunotherapy, Vaccines, and Virotherapy,  
11 Biodesign Institute, Arizona State University, Tempe, AZ 85287-4501, USA

12 <sup>2</sup>Department of Physics and Center for Biological Physics, Arizona State University  
13 Tempe, AZ 85287-1504, USA

14 <sup>3</sup>Department of Molecular Pharmacology and Experimental Therapeutics, Mayo Clinic,  
15 Rochester, MN 55905, USA

16 <sup>4</sup>Molecular Modeling and Biopharmaceutical Center and Department of Pharmaceutical  
17 Sciences, College of Pharmacy, University of Kentucky, Lexington, KY 40536, USA

18 <sup>†</sup>Current Address: Temasek Life Sciences Laboratory, National University of Singapore,  
19 Singapore 117604

20 <sup>‡</sup>Current Address: Department of Botany, College of Letters and Sciences, University of  
21 Wisconsin Madison, Madison, WI 53706, USA

22 <sup>^</sup>Current Address: Department of Animal Science, College of Agriculture and Life  
23 Sciences, Cornell University, Ithaca, NY 14853, USA

1 ‡ Current Address: ARUP Labs, Salt Lake City, UT 84108, USA

2 \*To whom correspondence should be addressed:

3 School of Life Sciences and The Biodesign Institute

4 P.O. Box 874501

5 Arizona State University

6 Tempe, AZ 85287-4501, USA

7 Tel: 1-480-727-7405; Fax: 1- 480-965-6899

8 Email: [tsafir.mor@asu.edu](mailto:tsafir.mor@asu.edu)

9

10

11

12

13

**Supplementary material includes:**

14 1. Figure Legends for Supplementary Figures S1 and S2

15 2. Supplementary Table S1 and Table S2

16 3. Supplementary Figures S1 and S2

17

## 1 **Legends for Supplementary Figures**

### 2 **Supplementary Figure S1. Schematic diagrams describing the kinetics of** 3 **cholinesterase-catalyzed hydrolysis of substrates**

4 (a) Scheme 1 describes the reaction of cholinesterase (E)-catalyzed hydrolysis of  
5 substrates (S).  $K_{ss}$  is the dissociation constant of the peripheral site. The hydrolysis  
6 capacity ( $bK_{cat}$ ) reflects the allosteric effect of substrate binding at the peripheral binding  
7 site. (b) Scheme 2 describes the reaction in terms of uncompetitive substrate  
8 inhibition/activation and cooperative substrate binding with characteristic Hill coefficients  
9  $n$  and  $x$  that describe cooperativity or anticooperativity

### 10 **Supplementary Figure S2. Modeling of wild type and mutant by using Elastic** 11 **Network Model (ENM)**

12 WT human BChE and BChE<sub>V4</sub> are modeled by ENM. The spheres indicate the locations  
13 of alpha-carbons of each amino acid and the sticks are representing the harmonic  
14 oscillators (i.e. springs) between them. The thickness of the sticks represents the  
15 magnitude of the spring constant. For WT hBChE the mutation positions are shown as  
16 blue spheres (A199, F227, S287, A328, and Y332) and for the pentavalent mutant  
17 BChE<sub>V4</sub> the mutation positions are shown as red spheres (S199, A227, G287, W328,  
18 and G332). The spring constant for each connection is assumed to be same for the WT  
19 (i.e. the thickness of the blue sticks is same as grey sticks). The mutation at a given  
20 position are considered to destabilize the interactions of the mutational site. This is  
21 incorporated in the model as a decrease in spring constant (low thickness values are  
22 shown as red sticks indicating a loss in interaction strength with mutated positions).

23

1 **Supplementary Table S1**

2

3

4

5

**Table S1.** Cocaine hydrolase variants of butyrylcholinesterase used in this study.

| <b>Name</b>         | <b>Amino acid mutations</b>   | <b>References</b>                        |
|---------------------|-------------------------------|------------------------------------------|
| pBChE <sub>V2</sub> | F227A/S287G/A328W/Y332A       | Pancook, <i>et al.</i> 2003              |
| pBChE <sub>V3</sub> | A199S/S287G/A328W/Y332G       | Pan, <i>et al.</i> 2005                  |
| pBChE <sub>V4</sub> | A199S/F227A/S287G/A328W/Y332G | Xue, <i>et al.</i> 2013                  |
| pBChE <sub>V5</sub> | F227A/S287G/A328W/Y332G       | Brimijoin and co-workers,<br>unpublished |

6

7

8

1 **Supplementary Table S2**

2

3

4

5

**Table S2.** Oligonucleotides used for site-directed mutagenesis. Forward (F) and reverse (R) primers are shown with mutation sites indicated in lowercase.

| Name   | Primer Sequence                                             | Mutation    |
|--------|-------------------------------------------------------------|-------------|
| oTM607 | (F) 5'CTTTGGAGAGTCTtctGGAGCTGCTTCTG <sup>3'</sup>           | A199S       |
| oTM608 | (R) 5'CAGAAGCAGCTCCagaAGACTCTCCAAAG <sup>3'</sup>           | A199S       |
| oTM609 | (F) 5'CCAATCTGGTTCCgctAATGCTCCTTGG <sup>3'</sup>            | F227A       |
| oTM610 | (R) 5'CCAAGGAGCATTagcGGAACCAGATTGG <sup>3'</sup>            | F227A       |
| oTM611 | (F) 5'GGAACCTCTTTGggaGTGAACTTTGGTC <sup>3'</sup>            | S287G       |
| oTM612 | (R) 5'GACCAAAGTTCACTccCAAAGGAGTTCC <sup>3'</sup>            | S287G       |
| oTM613 | (F) 5'GGATGAGGGTACAtggTTCCTTGTGggtGGAGCGCCTGG <sup>3'</sup> | A328W/Y332G |
| oTM614 | (R) 5'CCAGGCGCTCCaccCACAAGGAAccaTGTACCCTCATCC <sup>3'</sup> | A328W/Y332G |
| oTM655 | (F) 5'GGTTCCTTGTGgctGGAGCGCCTGG <sup>3'</sup>               | Y332A       |
| oTM656 | (R) 5'CCAGGCGCTCCagcCACAAGGAACC <sup>3'</sup>               | Y332A       |

6

7

8

1 **Supplementary Figure S1**

2

3

**a. Scheme 1**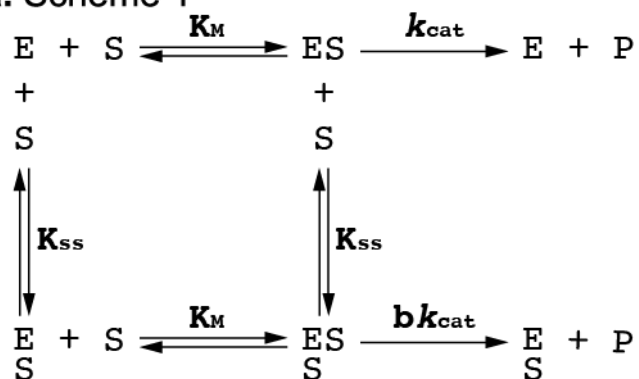**b. Scheme 2**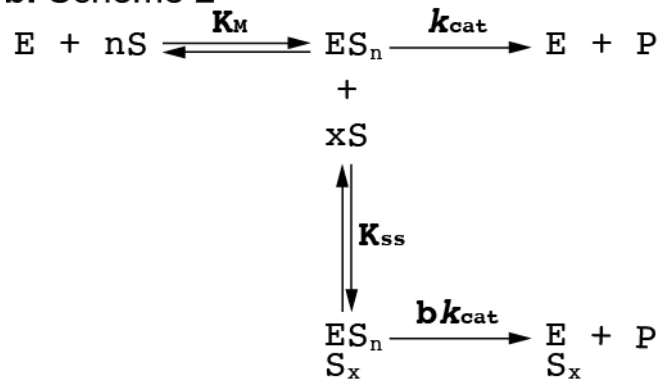

1 **Supplementary Figure S2**

2

3

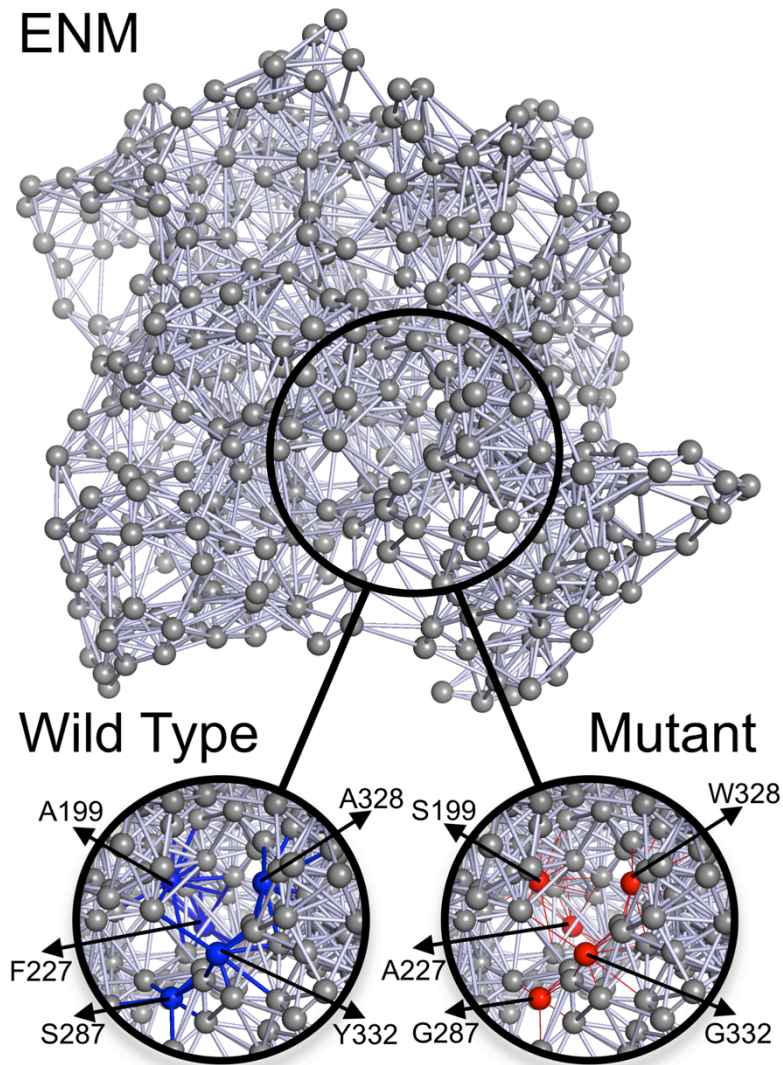

4
